# Supplementary material for: Human papillomavirus association is the most important predictor for surgically treated patients with oropharyngeal cancer
Source: PubMed Central journal article supplement — Br J Cancer. 2017 May 4;116(12):1604–11. doi: 10.1038/bjc.2017.132 (PMC5518861; doi:10.1038/bjc.2017.132), 2017-05-04
Supplement: bjc2017132x1.pdf [file bjc2017132x1.pdf]

**Supporting Table 1: Characteristics of the 359 oropharyngeal squamous cell carcinoma patients treated with curative intent.**

| Characteristic (undichotomized)       |     |       | Dichotomized characteristics |       |                           |
|---------------------------------------|-----|-------|------------------------------|-------|---------------------------|
|                                       | N   | %     | N                            | %     |                           |
| <b>Gender</b>                         |     |       |                              |       |                           |
|                                       |     |       | 81                           | 22.6% | Female                    |
|                                       |     |       | 278                          | 77.4% | Male                      |
| <b>Age (years)</b>                    |     |       |                              |       |                           |
|                                       |     |       | 194                          | 54.0% | < 60                      |
|                                       |     |       | 165                          | 46.0% | ≥60                       |
| <b>HPV-Status</b>                     |     |       |                              |       |                           |
|                                       |     |       | 273                          | 76.0% | negative                  |
|                                       |     |       | 74                           | 20.6% | positive                  |
|                                       |     |       | 12                           | 3.3%  | unknown                   |
| <b>T-classification</b>               |     |       |                              |       |                           |
| T1                                    | 78  | 21.7% | 263                          | 73.3% | T1-T3                     |
| T2                                    | 104 | 29.0% |                              |       |                           |
| T3                                    | 81  | 22.6% |                              |       |                           |
| T4                                    | 94  | 26.2% |                              |       |                           |
| unknown                               | 2   | 0.6%  | 94                           | 26.2% | ≥T4                       |
|                                       |     |       | 2                            | 0.6%  | unknown                   |
| <b>N-classification</b>               |     |       |                              |       |                           |
| N0                                    | 97  | 27.0% | 175                          | 48.7% | N0-N2a                    |
| N1                                    | 47  | 13.1% |                              |       |                           |
| N2                                    | 13  | 3.6%  |                              |       |                           |
| N2a                                   | 18  | 5.0%  |                              |       |                           |
| N2b                                   | 113 | 31.5% | 180                          | 50.1% | ≥N2b                      |
| N2c                                   | 53  | 14.8% |                              |       |                           |
| N3                                    | 14  | 3.9%  |                              |       |                           |
| unknown                               | 4   | 1.1%  | 4                            | 1.1%  | unknown                   |
| <b>M-classification</b>               |     |       |                              |       |                           |
| M0                                    | 317 | 88.3% | 317                          | 88.3% | M0                        |
| M+                                    | 23  | 6.4%  | 23                           | 6.4%  | M+                        |
| unknown                               | 19  | 5.3%  | 19                           | 5.3%  | unknown                   |
| <b>Clinical classification (UICC)</b> |     |       |                              |       |                           |
| I                                     | 39  | 10.9% | 126                          | 35.1% | I-III                     |
| II                                    | 33  | 9.2%  |                              |       |                           |
| III                                   | 54  | 15.0% |                              |       |                           |
| IVa                                   | 161 | 44.8% | 232                          | 64.6% | ≥IV                       |
| IVb                                   | 46  | 12.8% |                              |       |                           |
| IVc                                   | 25  | 7.0%  |                              |       |                           |
| unknown                               | 1   | 0.3%  | 1                            | 0.3%  | unknown                   |
| <b>ECOG performance status</b>        |     |       |                              |       |                           |
| 0                                     | 24  | 6.7%  | 239                          | 66.6% | 0-1                       |
| 1                                     | 215 | 59.9% |                              |       |                           |
| 2                                     | 104 | 29.0% |                              |       |                           |
| 3                                     | 13  | 3.6%  |                              |       |                           |
| 4                                     | 1   | 0.3%  | 118                          | 32.9% | ≥2                        |
| unknown                               | 2   | 0.6%  |                              |       |                           |
|                                       |     |       | 2                            | 0.6%  | unknown                   |
| <b>Smoking</b>                        |     |       |                              |       |                           |
|                                       |     |       | 59                           | 16.4% | < 10 pack-years           |
|                                       |     |       | 267                          | 74.4% | ≥10 pack-years            |
|                                       |     |       | 33                           | 9.2%  | unknown                   |
| <b>Alcohol</b>                        |     |       |                              |       |                           |
|                                       |     |       | 117                          | 32.6% | ≤ 2 standard drinks / day |
|                                       |     |       | 145                          | 40.4% | > 2 standard drinks / day |
|                                       |     |       | 97                           | 27.0% | unknown                   |
| <b>Therapy (curative intent only)</b> |     |       |                              |       |                           |
| surgery only                          | 49  | 13.6% | 203                          | 56.5% | surgical treatment        |
| surgery plus adj. radiation           | 87  | 24.2% |                              |       |                           |
| surgery plus adj. chemoradiation      | 58  | 16.2% |                              |       |                           |
| surgery plus unknown adj. treatment   | 9   | 2.5%  |                              |       |                           |
| definitive radiation                  | 24  | 6.7%  | 156                          | 43.5% | non-surgical treatment    |
| definitive chemoradiation             | 131 | 36.5% |                              |       |                           |
| unknown treatment without surgery     | 1   | 0.3%  |                              |       |                           |
