# Supplementary material for: Human papillomavirus association is the most important predictor for surgically treated patients with oropharyngeal cancer
Source: PubMed Central journal article supplement — Br J Cancer. 2017 May 4;116(12):1604–11. doi: 10.1038/bjc.2017.132 (PMC5518861; doi:10.1038/bjc.2017.132), 2017-05-04
Supplement: bjc2017132x2.pdf [file bjc2017132x2.pdf]

**Supporting Table 2: Survival analyse of patients with OPSCC after stratification by RPA based models**

| RPA model generated for    | risk group defined by RPA model | treatment                | n        | Survival  |      |       |       |       |                      | COX regression       |       |       |                      |
|----------------------------|---------------------------------|--------------------------|----------|-----------|------|-------|-------|-------|----------------------|----------------------|-------|-------|----------------------|
|                            |                                 |                          |          | Median OS |      | 2y-OS | 3y-OS | 5y-OS | p-value log-rank     | Hazard Ratio (HR)    | CI    |       | P                    |
|                            |                                 |                          |          | [years]   | SD   |       |       |       |                      |                      | lower | upper |                      |
| all treatments             | low risk (Node 10)              | surgical or non-surgical | 64       | -         | -    | 92%   | 89%   | 86%   |                      | 1                    |       |       |                      |
|                            | intermed. risk (Node 4+6+11)    |                          | 157      | 5.72      | 0.71 | 75%   | 66%   | 53%   | < 0.001 <sup>a</sup> | 2.59                 | 1.58  | 4.24  | < 0.001 <sup>a</sup> |
|                            | high risk (Node 7+8)            |                          | 138      | 1.45      | 0.20 | 41%   | 29%   | 19%   | < 0.001 <sup>b</sup> | 6.88                 | 4.22  | 11.22 | < 0.001 <sup>b</sup> |
|                            | low risk (Node 10)              | surgical                 | 50       | -         | -    | 98%   | 94%   | 92%   | 0.002                | 1                    |       |       | 0.004                |
|                            |                                 | non-surgical             | 14       | 5.54      | -    | 71%   | 64%   | 57%   |                      | 4.38                 | 1.63  | 11.82 |                      |
|                            | intermediate risk (Node 4+6+11) | surgical                 | 102      | 9.44      | 1.79 | 89%   | 81%   | 64%   | < 0.001              | 1                    |       |       | < 0.001              |
|                            |                                 | non-surgical             | 55       | 1.98      | 0.44 | 49%   | 38%   | 32%   |                      | 2.59                 | 1.72  | 3.91  |                      |
|                            | high risk (Node 7+8)            | surgical                 | 51       | 1.94      | 0.80 | 49%   | 43%   | 31%   | 0.035                | 1                    |       |       | 0.037                |
|                            |                                 | non-surgical             | 87       | 1.42      | 0.18 | 36%   | 21%   | 12%   |                      | 1.50                 | 1.03  | 2.19  |                      |
|                            | surgical treatment              | low risk (Node 5)        | surgical | 50        | -    | -     | 98%   | 96%   | 94%                  | < 0.001 <sup>a</sup> | 1     |       |                      |
| intermediate risk (Node 3) |                                 | 117                      |          | 7.56      | 1.80 | 85%   | 77%   | 60%   | 3.33                 |                      | 1.76  | 6.31  |                      |
| high risk (Node 4)         |                                 | 36                       |          | 1.69      | 0.55 | 47%   | 42%   | 30%   | < 0.001 <sup>b</sup> |                      | 7.86  | 3.90  | 15.85                |
| non-surgical treatment     | low risk (Node 5)               | non-surgical             | 27       | 4.76      | 2.59 | 59%   | 56%   | 48%   | 0.044 <sup>a</sup>   | 1                    |       |       | 0.046 <sup>a</sup>   |
|                            | intermediate risk (Node 3)      |                          | 70       | 1.81      | 0.34 | 49%   | 33%   | 24%   |                      | 1.76                 | 1.01  | 3.06  |                      |
|                            | high risk (Node 4)              |                          | 59       | 1.13      | 0.29 | 30%   | 18%   | 11%   |                      | 0.012 <sup>b</sup>   | 2.82  | 1.60  |                      |

p-values: a: low- vs. intermediate. b: intermediate- vs. high-risk.
